# Supplementary material for: Climate Change Forces New Ecological States in Tropical Andean Lakes
Source: PLoS One. 2015 Feb 3;10(2):e0115338. doi: 10.1371/journal.pone.0115338 (PMC4315470; doi:10.1371/journal.pone.0115338)
Supplement: S2 File — 210Pb radiochemistry and constant rate of supply (CRS) age model for the Laguna Toreadora (Table B), Chorerras (Table C) and Llaviacu (Table D) sediment cores. (XLSX) [file pone.0115338.s005.xlsx]

## Sheet: Toreadora
Table B. 210Pb radiochemistry and constant rate of supply (CRS) age model for the Laguna Toreadora sediment core.
Midpoint Depth	Unsupported 210Pb	Error	Supported 210Pb	Error	210Pb inventory	Error	CRS model	Year (CRS)	CRS error
(cm)	activity (Bq kg-1)	(Bq kg-1)	activity (Bq kg-1)	(Bq kg-1)	(Bq m-2)	(Bq m-2)	age (yrs)	(year CE)	(yrs)
0	1270.2	70.5711			5034.76	46.0587	0	2011.51	0
0.13	1113.6	113.808	210.808	16.6941	4808.24	46.1332	1.4783	2010.04	0.0094
0.38	879.996	105.659	216.728	16.8458	4281.71	46.5834	5.2028	2006.31	0.0274
0.63	1072.33	217.155	227.233	38.6063	3408.65	50.9145	12.5257	1998.99	0.0696
0.88	735.07	152.186	223.915	26.8673	2522.51	53.2958	22.1937	1989.32	0.2922
1.13	774.83	132.179	158.916	22.6248	1917.64	54.5112	30.9977	1980.52	0.5337
1.38	340.531	147.669	211.259	27.79	1434.89	56.028	40.3107	1971.2	0.8732
1.63	234.309	101.184	172.071	19.178	1178.77	56.7677	46.6249	1964.89	1.1654
1.88	78.4371	104.535	157.241	20.6715	1052.08	57.3977	50.276	1961.24	1.3685
2.13	88.4834	89.0048	122.005	17.2824	985.739	57.8342	52.3677	1959.15	1.4987
2.38	47.2694	84.6038	132.438	16.6735	934.719	58.1833	54.0743	1957.44	1.612
2.63	0	133.274	128.345	26.8121	914.166	59.3264	54.7883	1956.73	1.6889
2.88	59.6889	81.5189	131.21	16.0698	886.94	59.7919	55.7593	1955.76	1.7668
3.13	59.0836	57.0541	137.614	11.8377	843.544	59.9378	57.3702	1954.14	1.8837
3.38	0	66.6818	115.269	13.4393	823.019	60.1166	58.1613	1953.35	1.9467
3.63	104.57	94.9329	123.553	19.2569	778.79	60.6538	59.9351	1951.58	2.0991
3.88	39.581	72.8643	116.672	14.6038	716.13	60.9841	62.6288	1948.89	2.3318
4.13	0	72.9891	152.173	15.1394	699.986	61.2741	63.361	1948.15	2.4065
4.38	110.308	74.7895	105.254	14.6201	655.346	61.5755	65.4771	1946.04	2.6116
4.63	0	71.9268	122.394	14.5887	612.731	61.8258	67.6363	1943.88	2.8337
4.88	3.1755	70.9566	115.861	14.4374	611.477	62.079	67.7021	1943.81	2.8519
5.13	0	75.4509	139.611	15.7043	610.218	62.3667	67.7683	1943.75	2.8718
5.38	7.5696	68.921	140.112	14.0683	607.293	62.5938	67.9226	1943.59	2.8981
5.63	33.1889	72.6064	121.02	14.3435	591.238	62.8549	68.783	1942.73	3.0007
5.88	0	79.4523	122.103	16.0705	576.969	63.2251	69.5675	1941.95	3.1035
6.25	14.364	36.634	110.439	8.398	570.018	63.3245	69.9567	1941.56	3.1514
6.75	101.155	39.5046	96.6373	7.8769	509.447	63.4642	73.5644	1937.95	3.5849
7.25	58.8403	36.5169	106.079	7.4521	424.274	63.5847	79.4394	1932.08	4.3982
7.75	12.3573	33.6495	106.705	7.2384	387.73	63.6785	82.3318	1929.18	4.8598
8.25	23.9867	34.9275	109.532	7.2756	369.386	63.7763	83.8882	1927.63	5.13
8.75	60.3322	34.0737	93.2261	6.7891	324.11	63.8828	88.0873	1923.43	5.9154
9.25	35.0749	28.8647	81.4627	5.7998	269.711	63.9681	93.9874	1917.53	7.2028
9.75	32.8316	29.1324	90.9731	6.2469	230.809	64.0557	98.9894	1912.53	8.4989
10.25	38.3087	30.6839	110.218	6.6391	189.412	64.1559	105.337	1906.18	10.464
10.75	0	26.0997	95.2749	5.6681	166.308	64.2331	109.514	1902	11.9899
11.25	18.8589	24.551	93.3016	5.6228	155.181	64.2986	111.738	1899.78	12.8926
11.75	0	28.0389	91.7018	6.1221	144.187	64.3816	114.098	1897.42	13.9253
12.25	7.5858	29.3692	93.135	6.2066	139.732	64.474	115.106	1896.41	14.4032
12.75	29.3845	28.7952	93.8929	6.1004	117.439	64.5679	120.687	1890.83	17.2415
13.25	0	26.2718	88.6723	5.8535	98.9072	64.6529	126.202	1885.31	20.577
14.25	30.3571	33.4092	90.7669	6.8827	81.3321	64.769	132.485	1879.03	25.1585
16.25	14.7723	34.0179	87.9509	7.1542	57.3323	64.8701	143.714	1867.8	35.9202
18.25	28.2318	31.1066	84.4799	6.4903	33.6913	64.9605	160.786	1850.73	61.5024
20.25	29.7268	29.5917	83.9686	6.1795	1.7278	65.0429	256.174	1755.34	1208.47
22.25	37.6438	29.9586	88.97	6.2723

## Sheet: Chorreras
Table C. 210Pb radiochemistry and constant rate of supply (CRS) age model for the Laguna Chorreras sediment core.
Midpoint Depth	Unsupported 210Pb	Error	Supported 210Pb	Error	210Pb inventory	Error	CRS model	Year (CRS)	CRS error
(cm)	activity (Bq kg-1)	(Bq kg-1)	activity (Bq kg-1)	(Bq kg-1)	(Bq m-2)	(Bq m-2)	age (yrs)	(year CE)	(yrs)
0	814.777	45.9056			3001.03	25.6385	0	2011.51
0.25	635.671	129.938	61.5022	20.225	2582.8	26.8341	4.8195	2006.69	0.0709
0.75	576.063	60.6653	53.5621	7.7477	2168.31	27.2929	10.437	2001.07	0.0505
1.13	354.961	63.8838	49.1914	9.5334	1808.88	27.8014	16.2572	1995.25	0.1588
1.38	270.74	81.7604	52.7656	13.3394	1540.74	28.7169	21.4095	1990.1	0.2563
1.63	253.443	54.45	42.9111	8.2691	1329.18	29.0866	26.1527	1985.36	0.3628
1.88	94.2391	49.132	46.0373	8.3645	1208.53	29.2893	29.2085	1982.3	0.4395
2.13	62.5173	59.7741	52.0949	10.1963	1143.96	29.7025	30.9716	1980.54	0.4904
2.38	141.361	51.3479	37.2177	8.3486	1056.57	30.0389	33.5237	1977.99	0.5673
2.63	49.6836	40.1101	36.1956	6.97	985.936	30.1861	35.7457	1975.76	0.6378
2.88	36.1764	41.8585	32.7861	7.2779	954.422	30.3427	36.7889	1974.72	0.6742
3.13	130.009	47.578	40.5213	7.4664	886.851	30.5973	39.1469	1972.36	0.7598
3.38	11.5254	38.0847	43.052	6.567	831.547	30.7418	41.2146	1970.29	0.8388
3.63	29.1968	40.8422	39.1987	7.0421	815.524	30.9097	41.8395	1969.67	0.8669
3.88	78.7893	33.7307	37.187	5.6258	772.939	31.0271	43.5617	1967.95	0.9386
4.13	33.7561	68.8522	45.4484	11.7742	722.334	31.6396	45.7362	1965.77	1.0495
4.38	101.975	62.2304	37.7233	10.5645	651.8	32.3024	49.0358	1962.47	1.228
4.63	33.3617	49.9104	51.9221	8.7948	587.082	32.6539	52.3939	1959.12	1.4203
4.83	56.9876	39.3175	38.0741	6.7442	546.712	32.8444	54.6817	1956.83	1.5624
5.25	36.3473	27.2998	35.2012	4.776	496.035	32.979	57.8056	1953.7	1.7683
5.75	36.2115	29.0979	30.4901	4.9123	448.291	33.2023	61.0556	1950.45	2.0105
6.75	57.0696	37.5653	42.9007	6.442	386.44	33.5781	65.8232	1945.69	2.4199
7.25	37.9947	32.0897	42.0369	5.743	324.533	33.839	71.4298	1940.08	2.977
7.75	4.9816	31.4751	40.6722	5.5779	296.473	34.0877	74.3338	1937.18	3.3188
8.25	61.5594	33.3569	39.4483	5.8272	252.467	34.3768	79.4936	1932.02	3.9973
8.75	5.432	34.5115	44.9383	6.2287	207.482	34.6879	85.7953	1925.71	4.9914
9.25	23.1328	35.6047	43.6516	6.2238	188.107	35.0232	88.9436	1922.57	5.5985
9.75	76.8802	31.8325	38.8319	5.4222	120.608	35.2933	103.217	1908.29	9.0158
10.25	4.9458	33.0357	38.4722	5.9905	65.1038	35.5767	123.016	1888.49	17.1658
10.75	34.3633	27.7297	41.0802	4.898	37.1556	35.7962	141.028	1870.48	30.5539
11.25	17.397	26.9343	37.9328	4.88
12.25	4.4309	31.1517	39.7452	5.6242
12.75	15.4153	28.9105	39.9675	5.1478
13.25	0	28.7731	43.3028	5.2418
13.75	21.289	28.1023	44.0889	5.0802
14.25	6.7528	29.8519	40.9931	5.3204
14.75	0	25.5662	42.9018	4.7502
15.25	21.8564	27.1329	40.9302	4.9172
16.25	11.8773	29.9611	38.658	5.4153
17.25	0	30.2099	42.4009	5.4855
18.25	15.1377	34.8743	38.2716	6.1891
19.25	11.95	31.1699	37.938	5.4388
20.25	5.6349	30.6634	40.6716	5.5589

## Sheet: Llaviacu
Table D. 210Pb radiochemistry and constant rate of supply (CRS) age model for the Laguna Llaviacu sediment core.
Midpoint Depth	Unsupported 210Pb	Error	Supported 210Pb	Error	210Pb inventory	Error	CRS model	Year (CRS)	CRS error	Error (CRS)
(cm)	activity (Bq kg-1)	(Bq kg-1)	activity (Bq kg-1)	(Bq kg-1)	(Bq m-2)	(Bq m-2)	age (yrs)	(year CE)	(yrs)	[y]
0	257.549	17.9244			239.624	8241.59	44.2694	0	2011.51
0.13	309.252	54.2047	22.1578	7.5917	255.047	8144.27	44.3148	0.3815	2011.13	0.0075
0.38	312.924	46.169	30.3846	6.4458	266.755	7840.57	44.5947	1.6018	2009.91	0.019
0.63	274.333	44.3416	32.6009	7.0698	229.991	7523.56	44.8988	2.9272	2008.58	0.0239
0.88	232.158	36.8009	25.3333	5.3067	195.357	7295.36	45.0449	3.9163	2007.59	0.0231
1.13	222.504	40.4502	27.7575	5.9063	182.054	7098.85	45.2005	4.7932	2006.72	0.0215
1.38	255.927	42.6771	28.5686	6.1743	213.25	6907.33	45.3521	5.6715	2005.84	0.0176
1.63	192.337	42.5187	24.5403	6.4127	149.818	6725.45	45.4963	6.5284	2004.98	0.0087
1.88	204.919	38.4469	19.8493	5.573	166.472	6537.05	45.6625	7.4408	2004.07	0.0158
2.13	255.449	48.6618	18.1672	6.906	206.787	6287.28	46.0077	8.6919	2002.82	0.0269
2.38	250.288	34.4505	16.4523	4.5478	215.838	6028.07	46.178	10.0439	2001.47	0.0418
2.63	203.663	37.3458	24.0913	5.4871	166.318	5781.74	46.3813	11.3837	2000.13	0.0548
2.88	203.373	51.6702	18.7234	7.5623	151.703	5579.76	46.6853	12.5256	1998.98	0.0648
3.13	136.506	29.2128	21.3196	4.412	107.294	5428.81	46.7651	13.4063	1998.1	0.0739
3.63	117.868	27.1578	26.7786	4.1287	90.7102	5153.19	47.1678	15.0796	1996.43	0.09
4.13	76.3222	26.4237	21.3473	4.0474	49.8985	4913.73	47.6341	16.6076	1994.9	0.1054
4.63	87.2579	32.0671	23.6928	4.2323	55.1909	4702.07	48.3774	18.0215	1993.49	0.1198
5.13	116.466	24.645	20.858	4.1253	91.8207	4440.25	48.8353	19.8613	1991.65	0.1417
5.63	95.8721	24.0673	20.9742	4.1108	71.8047	4171.44	49.2434	21.8668	1989.64	0.1673
6.13	149.334	28.7369	22.8729	4.2866	120.597	3853.97	49.8759	24.4088	1987.1	0.2023
6.63	138.512	29.1577	21.1806	4.3925	109.354	3485.54	50.4924	27.6356	1983.87	0.2512
7.13	74.9485	31.7942	20.8352	4.9785	43.1543	3202.13	51.2123	30.3589	1981.15	0.2976
7.63	98.4148	27.575	20.9706	4.1873	70.8398	2940.97	51.9233	33.091	1978.42	0.349
8.13	52.9385	23.1355	24.3396	3.767	29.8029	2718.15	52.3796	35.6212	1975.89	0.4001
8.63	98.3951	26.9545	17.9635	4.154	71.4406	2516.95	52.8994	38.0907	1973.42	0.455
9.13	72.4143	25.6744	18.9725	4.1026	46.7399	2299.66	53.3168	40.9901	1970.52	0.5241
9.63	50.634	22.0186	25.1655	3.5819	28.6155	2139.39	53.6324	43.31	1968.2	0.5843
10.25	58.0151	21.3788	21.3026	3.4209	36.6363	1969.39	54.063	45.9688	1965.54	0.6599
11.25	36.1115	21.3061	21.8587	3.3927	14.8054	1754.41	54.9441	49.6807	1961.83	0.7814
12.25	11.4116	20.7257	26.9913	3.5349	-9.3141	1649.77	55.6982	51.6557	1959.85	0.8571
13.25	39.2868	21.7255	22.0631	3.5052	17.5613	1533.11	56.6027	54.0109	1957.5	0.9552
14.25	52.1178	24.6736	18.3226	4.4417	27.4442	1328.24	57.6964	58.6173	1952.89	1.1612
15.25	67.6809	25.8572	20.3526	4.0971	41.8237	1090.85	58.6294	64.94	1946.57	1.49
16.25	87.3049	25.1172	21.8059	4.0228	62.1878	802.802	59.4115	74.7861	1936.72	2.1395
17.25	87.773	25.076	22.2075	3.9766	62.697	470.026	60.2167	91.9769	1919.53	3.8762
18.25	33.3001	22.812	26.1622	3.7831	10.4881	232.083	60.8875	114.639	1896.87	8.1861
19.25	80.5205	25.3425	23.9274	4.1485	55.178	14.4851	61.6914	203.72	1807.79	136.527
20.25	86.8491	29.0117	24.3848	4.5355	57.8374
