# Supplementary material for: Climate Change Forces New Ecological States in Tropical Andean Lakes
Source: PLoS One. 2015 Feb 3;10(2):e0115338. doi: 10.1371/journal.pone.0115338 (PMC4315470; doi:10.1371/journal.pone.0115338)
Supplement: S4 File — Spectrally-inferred sediment chlorophyll a concentrations for Llaviacu (Table H), Toreadora (Table I) and Chorerras (Table J). (XLSX) [file pone.0115338.s007.xlsx]

## Sheet: Llaviacu
Table H. Spectrally-inferred sediment chlorophyll a concentrations for Llaviacu.
	Chla family - VR
Depth	(mg/g dry wt.)
0.875	0.0148957
1.125	0.0162525
1.375	0.0182164
1.625	0.0169158
1.875	0.0171179
2.125	0.015817
2.375	0.0155544
2.625	0.0153513
2.875	0.0149354
3.125	0.013928
3.375	0.0133835
3.625	0.0110952
3.875	0.0102882
4.125	0.00951396
4.375	0.0107672
4.625	0.0110204
4.875	0.0109212
5.125	0.00906957
5.375	0.00996168
5.625	0.0122169
5.875	0.013343
6.125	0.01327
6.375	0.0149007
6.625	0.0144579
6.875	0.0143573
7.125	0.0138442
7.375	0.014246
7.625	0.0132025
7.875	0.0126872
8.125	0.0111356
8.375	0.0100613
8.625	0.0102694
8.875	0.0103285
9.125	0.00883227
9.375	0.0089413
9.625	0.00827758
9.875	0.00798258
10.25	0.00829608
10.75	0.00747522
11.25	0.0076058
11.75	0.00714134
12.25	0.00716566
12.75	0.00675615
13.25	0.00784998
13.75	0.00786352
14.25	0.00879744
14.75	0.00957487
15.25	0.0098442
15.75	0.00966352
16.25	0.00957693
16.75	0.0103809
17.25	0.0108036
17.75	0.0103642
18.25	0.00919582
18.75	0.00869402
19.25	0.00980476
19.75	0.0115351
20.25	0.0102911
20.75	0.00992614
21.25	0.0100659
21.75	0.01011
22.25	0.00846755
22.75	0.00979867
23.25	0.0101548
23.75	0.0100851
24.25	0.0104516
24.75	0.0103534
25.25	0.00806334
25.75	0.00755966
26.25	0.0086917
26.75	0.00928898
27.25	0.00816601
30.25	0.00810646
30.75	0.00792377
31.25	0.00840817
31.75	0.00837412
32.25	0.00783113
32.75	0.00717031
33.25	0.00692697
33.75	0.00748617
34.25	0.00729936
34.75	0.00686711
35.25	0.00589594
35.75	0.00528292
36.25	0.00633091
36.75	0.00630716
37.25	0.00622688
37.75	0.00624406
38.25	0.00579427
38.75	0.00646189
39.25	0.00716693
39.75	0.00757478
40.25	0.00603446
41.25	0.00569532
41.75	0.00510453
42.25	0.00567915
42.75	0.0062554
43.25	0.00603126
43.75	0.00697784
44.25	0.00662258
44.75	0.00685602
45.25	0.00734647
44.75	0.00595339
46.25	0.00676557
47.25	0.00693293
46.75	0.00670361
47.75	0.00684318
48.25	0.00722701
48.75	0.00767592
49.25	0.00781246
49.75	0.00824529
50.25	0.00827303
50.75	0.00488419
51.25	0.00498012
51.75	0.00580312
52.25	0.00470816
52.75	0.00710698
53.25	0.00778175
53.75	0.00597504
54.25	0.00685142
54.75	0.0085275
55.25	0.00851891
55.75	0.00705878
56.25	0.00926637
56.75	0.00906646
57.25	0.00991501
57.75	0.00992321
58.25	0.00986164
58.75	0.00976628
59.25	0.00917614
59.75	0.00809625
60.25	0.00762763
60.75	0.00701991
61.25	0.00442915
61.75	0.00694739
62.25	0.00741584
62.75	0.00777346
63.25	0.00749196
63.75	0.00734073
64.25	0.00768586
64.75	0.00807658
65.25	0.0077477
65.75	0.00641851
66.25	0.0055157
66.75	0.00463292
67.25	0.00737438
67.75	0.00781119
68.25	0.00806544
68.75	0.00799437

## Sheet: Toreadora
Table I. Spectrally-inferred sediment chlorophyll a concentrations for Toreadora.
	Chla family - VR
Depth	(mg/g dry wt.)
0.125	0.0153145
0.375	0.012516
0.625	0.017688
0.875	0.0200562
1.125	0.0249114
1.375	0.0279574
1.625	0.0280592
1.875	0.0303983
2.125	0.0328491
2.375	0.0241998
2.625	0.0311763
2.875	0.0275916
3.125	0.0278503
3.375	0.0258461
3.625	0.0254584
3.875	0.0269524
4.125	0.0270836
4.375	0.0272226
4.625	0.0270003
4.875	0.0253129
5.125	0.0224879
5.375	0.0231278
5.625	0.0223248
5.875	0.0220676
6.25	0.0242452
6.75	0.0253262
7.25	0.0253805
7.75	0.0257806
8.25	0.0254885
8.75	0.0246951
9.25	0.0218338
9.75	0.0223923
10.25	0.0230918
10.75	0.0237523
11.25	0.024883
11.75	0.0267293
12.25	0.0278088
12.75	0.0252226
13.25	0.0245591
13.75	0.0259856
14.25	0.0290268
14.75	0.0289752
15.25	0.029023
15.75	0.0279133
16.25	0.0274621
16.75	0.0256399
17.25	0.0279503
17.75	0.0281958
18.25	0.0286042
18.75	0.0273154
19.25	0.0281316
19.75	0.0277314
20.25	0.028609
20.75	0.0294416
21.25	0.0293464
21.75	0.0279675
22.25	0.0302977
22.75	0.0285172
23.25	0.0274378
23.75	0.027652
24.25	0.026202
24.75	0.02628
25.25	0.0265014
25.75	0.0269272
26.25	0.0271438
26.75	0.027495
27.25	0.0285555
27.75	0.0248874
28.25	0.0222493
28.75	0.0200738
29.25	0.0170683
29.75	0.0176697
30.25	0.022251
30.75	0.0270737
31.25	0.0274311
31.75	0.0274733
32.25	0.0276033
32.75	0.0280711
33.25	0.0292553
33.75	0.0265584
34.25	0.0269672
34.75	0.0269638
35.25	0.0249829
35.75	0.0263602
36.25	0.0285271
36.75	0.0323884
37.25	0.033631
37.75	0.0349107
38.25	0.0332948
38.75	0.0285878
39.25	0.0266178
39.75	0.0306516
40.25	0.0320459
40.75	0.0310028
41.25	0.0280879
41.75	0.031267
42.25	0.0296925
42.75	0.0287439
43.25	0.0280096
43.75	0.0260731
44.25	0.0272601
44.75	0.0268078
45.25	0.0279429
45.75	0.0309271
46.25	0.0292297
46.75	0.0300155
47.25	0.0317844
47.75	0.0306596
48.25	0.0295563
48.75	0.0310472
49.25	0.0235837
49.75	0.0200186
50.25	0.0229415
50.75	0.027319
51.25	0.0265528
51.75	0.0260755
52.25	0.023488
52.75	0.0208809
53.75	0.00708376
54.25	0.00736649
54.75	0.00654147
55.25	0.00930125
55.75	0.0110506
56.25	0.00988565
56.75	0.00766571
57.25	0.0119094
57.75	0.00926067
58.25	0.00803898
58.75	0.00877281
59.25	0.00554458
59.75	0.0118852
60.25	0.0118101
60.75	0.0126002
61.25	0.0139573
61.75	0.0150187
62.25	0.0152525
62.75	0.0150154
63.25	0.01555
63.75	0.0153389
64.25	0.0157269
64.75	0.0165755
65.25	0.0160095
65.75	0.0170348
66.25	0.0170141
66.75	0.0173166
67.25	0.0168654
67.75	0.0179322
68.25	0.0179371
68.75	0.0173088
69.25	0.018271
69.75	0.0221675

## Sheet: Chorerras
Table J. Spectrally-inferred sediment chlorophyll a concentrations for Chorerras.
	Chla family - VR
Depth	(mg/g dry wt.)
0.125	0.00766654
0.375	0.0112456
0.625	0.0111299
0.875	0.0127925
1.125	0.010067
1.375	0.0104483
1.625	0.0106034
1.875	0.0100249
2.125	0.0103131
2.375	0.00924783
2.625	0.00921413
2.875	0.0088984
3.125	0.00998166
3.375	0.00850147
3.625	0.00844301
3.875	0.00872614
4.125	0.00967233
4.375	0.00941484
4.625	0.00925804
4.875	0.00718017
5.25	0.00814774
5.25	0.00975033
6.25	0.0106929
6.75	0.0111874
7.25	0.0112195
7.75	0.0115954
8.25	0.0116314
8.75	0.0120198
9.25	0.0117022
9.75	0.0116189
10.25	0.0111689
10.75	0.0116916
11.25	0.0113516
11.75	0.0110461
12.25	0.0112723
12.75	0.0114815
13.25	0.0112768
13.75	0.0109885
14.25	0.010929
14.75	0.0108889
15.25	0.0108399
15.75	0.0107027
16.25	0.0100942
16.75	0.0098662
17.25	0.00980734
17.75	0.00981747
18.25	0.0096874
18.75	0.0101348
19.25	0.0100289
19.75	0.00931133
20.25	0.00914866
20.75	0.00957347
21.25	0.0102898
21.75	0.00994814
22.25	0.0103923
22.75	0.00932846
23.25	0.0093711
23.75	0.00945186
24.25	0.00879498
24.75	0.00934192
25.25	0.00860668
25.75	0.00842864
26.25	0.00825243
26.75	0.00840405
27.25	0.00851781
27.75	0.00817456
28.25	0.00827487
28.75	0.00828565
29.25	0.00804805
29.75	0.00814279
30.25	0.00829091
30.75	0.00823907
31.25	0.00812162
31.75	0.00807197
32.25	0.00837973
32.75	0.00734713
33.25	0.00707684
33.75	0.00708564
34.25	0.00715129
34.75	0.00705922
35.25	0.00691544
35.75	0.00681956
36.25	0.00691001
36.75	0.00691724
37.25	0.00682399
37.75	0.00671754
38.25	0.00706991
38.75	0.00665137
39.25	0.00648341
39.75	0.00707784
40.25	0.00770133
40.75	0.00820392
41.25	0.00831019
41.75	0.00764472
42.25	0.00881071
42.75	0.0086739
43.25	0.00935936
43.75	0.00914178
44.25	0.00962386
44.75	0.0102747
45.25	0.0109818
45.75	0.0115467
46.25	0.0112708
46.75	0.0123272
47.25	0.0112039
47.75	0.0126251
48.25	0.0115739
48.75	0.0124861
49.25	0.0115441
49.75	0.0101998
50.5	0.00956497
52	0.00777421
53.5	0.00818955
54.5	0.00827447
